# Supplementary material for: Enabling a high capacity and long cycle life for nano-Si anodes by building a stable solid interface with a Li+-conducting polymer
Source: Royal Society of Chemistry journal article supplement (doi:10.1039/c5ta01977j), 2015-01-01
Supplement: c5ta01977j1.pdf [file c5ta01977j1.pdf]

## Supporting Information

### **Enabling a High Capacity and Long Cycle Life of Nano-Si Anode by Building a Stable Solid Interface with Li<sup>+</sup>-Conducting Polymer**

Shi Zeng<sup>a</sup>, Daotan Liu<sup>b</sup>, Yao Chen<sup>a</sup>, Jiangfeng Qian<sup>a</sup>, Yuliang Cao<sup>a</sup>, Hanxi Yang<sup>a</sup>, and

Xinping Ai<sup>a\*</sup>

<sup>a</sup> Hubei Key Laboratory of Electrochemical Power Sources, College of Chemistry & Molecular Science, Wuhan University, Wuhan 430072, China

<sup>b</sup> China Electric Power Research Institute, Beijing, 100192, China.

\*CORRESPONDING AUTHOR: E-mail: [xpai@whu.edu.cn](mailto:xpai@whu.edu.cn)

Phone: +86 27-68754526

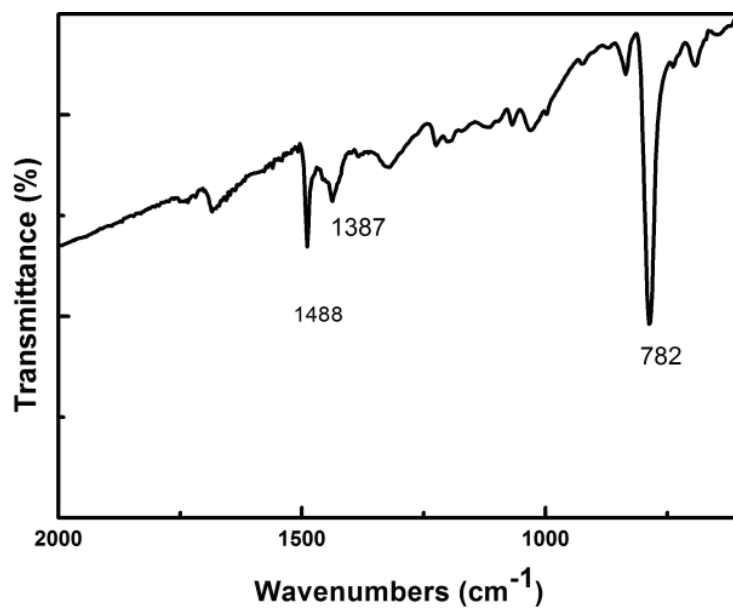

**Fig. S1.** FTIR spectra of the Si/PBT composite.

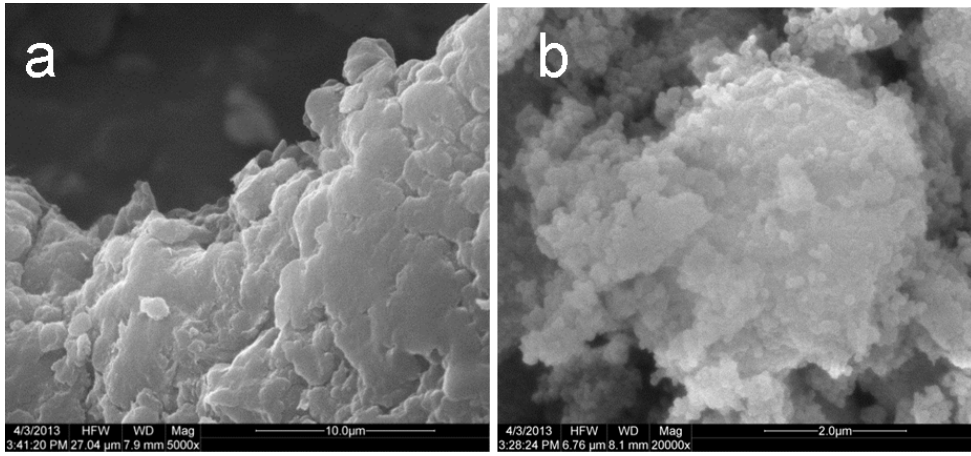

**Fig. S2.** SEM images of PBT (a) and (b) the Si/PBT composite.

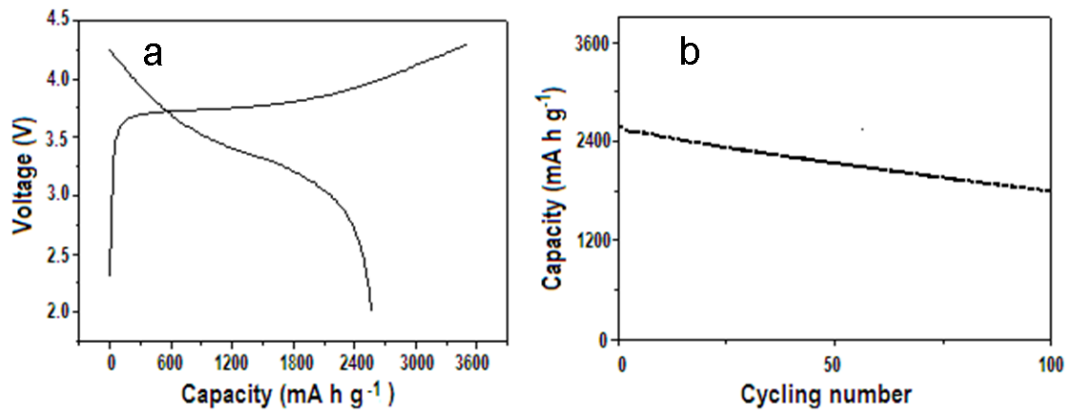

**Fig.S3.** Charge-discharge profile (a) and (b) cycling performance of the coin-type full cells using the Si/PBT as anode and  $\text{LiCo}_{1/3}\text{Ni}_{1/3}\text{Mn}_{1/3}\text{O}_2$  (NCM) as cathode. The charge-discharge capacities were calculated according to the mass weight of the Si/PBT anode. Charge and discharge currents were set at  $500 \text{ mA g}^{-1}$ .

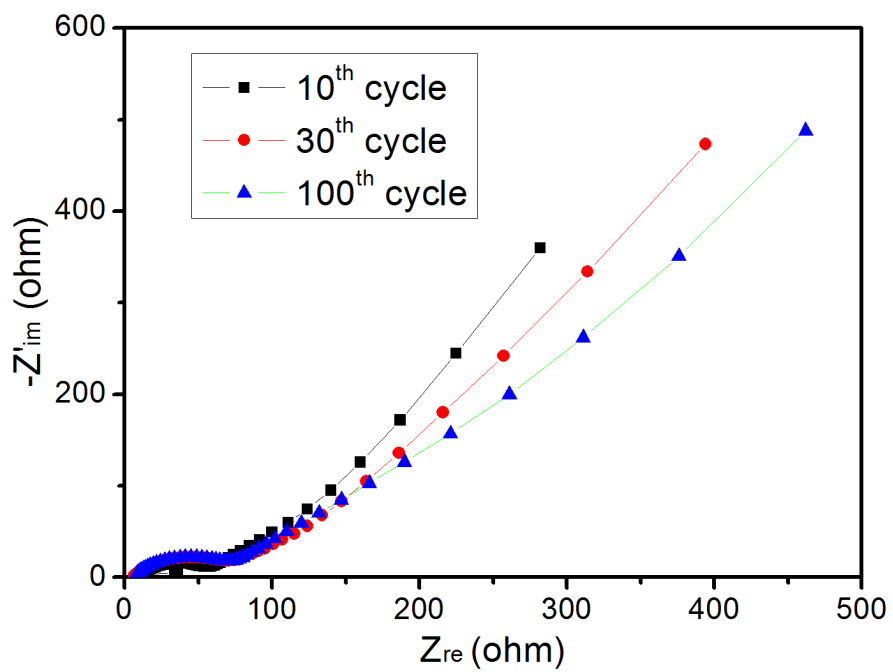

Fig.S4. The electrochemical impedance spectra (EIS) of the Si/PBT electrode at different cycles.

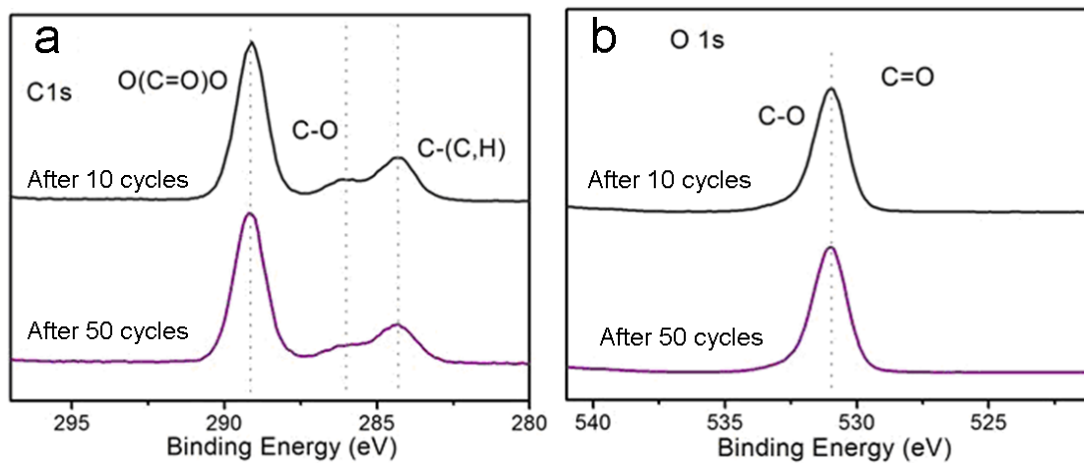

**Fig.S5.** XPS spectra of C 1S (a) and (b) O 1S collected from the surface of Si/PBT electrode at different cycles. The charge/discharge current density is  $3 \text{ A g}^{-1}$ .

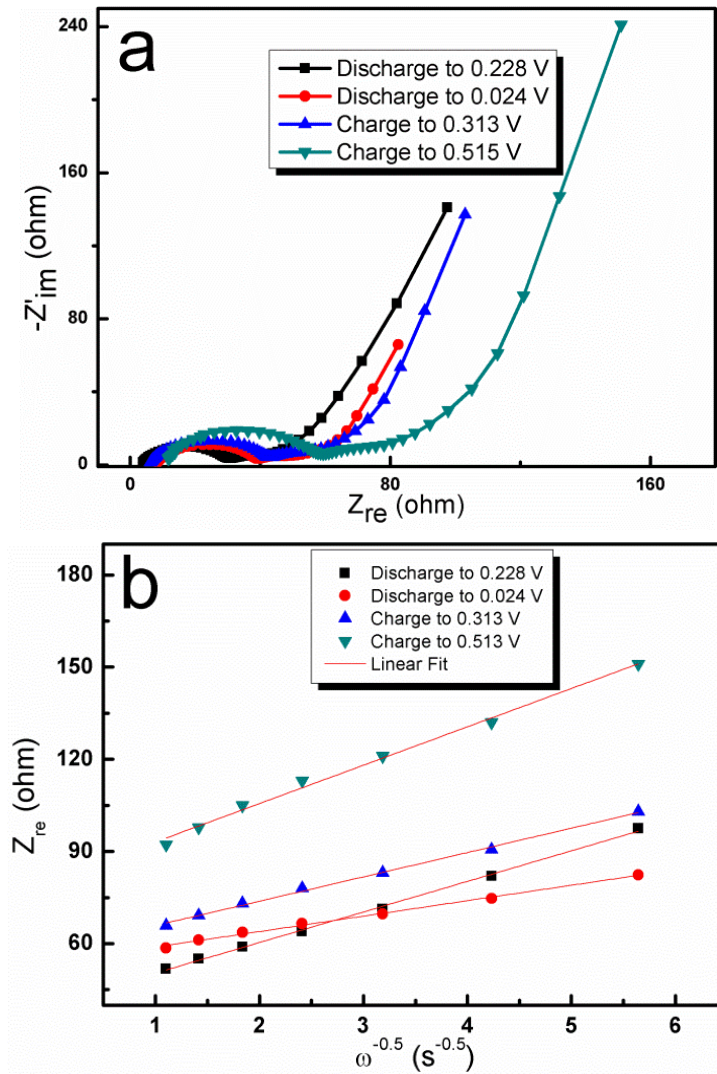

**Fig. S6.** EIS spectra of the PBT electrode at different charge/discharge states (a) and (b) the relationship between  $Z_{re}$  and  $\omega^{-0.5}$  at low frequency region

**Table S1.** The Warburg coefficient derived from EIS spectra (Figure S4) and diffusion coefficient of Li<sup>+</sup> ion in the PBT electrode at different charge and discharge states.

|                                      | Discharge (V, vs Li <sup>+</sup> /Li) |                        | Charge (V, vs Li <sup>+</sup> /Li) |                       |
|--------------------------------------|---------------------------------------|------------------------|------------------------------------|-----------------------|
|                                      | 0.228                                 | 0.024                  | 0.313                              | 0.513                 |
| $\sigma_w(\Omega \text{ s}^{-0.5})$  | 9.95                                  | 5.02                   | 7.92                               | 12.49                 |
| $D_{Li}(\text{cm}^2 \text{ S}^{-1})$ | $2.07 \times 10^{-9}$                 | $6.92 \times 10^{-10}$ | $1.10 \times 10^{-8}$              | $9.60 \times 10^{-9}$ |
